# Supplementary material for: Flame retardant epoxy resin based on organic titanate and polyhedral oligomeric silsesquioxane-containing additives with synergistic effects
Source: Royal Society of Chemistry journal article supplement (doi:10.1039/c7ra02529g), 2017-01-01
Supplement: c7ra02529g1.pdf [file c7ra02529g1.pdf]

## Electronic Supplementary Information

### Flame retardant epoxy resin based on the organic titanate and polyhedral oligomeric silsesquioxane-containing additives with synergistic effect

Birong Zeng\*, Yongzhou Liu, Li Yang, Wei Zheng, Ting Chen, Guorong Chen,  
Yiting Xu, Conghui Yuan, Lizong Dai

Fujian Provincial Key Laboratory of Fire Retardant Materials, College of Materials,  
Xiamen University, Xiamen Fujian, P.R. China 361005

#### Synthesis and characterization of POSS-bisDOPO

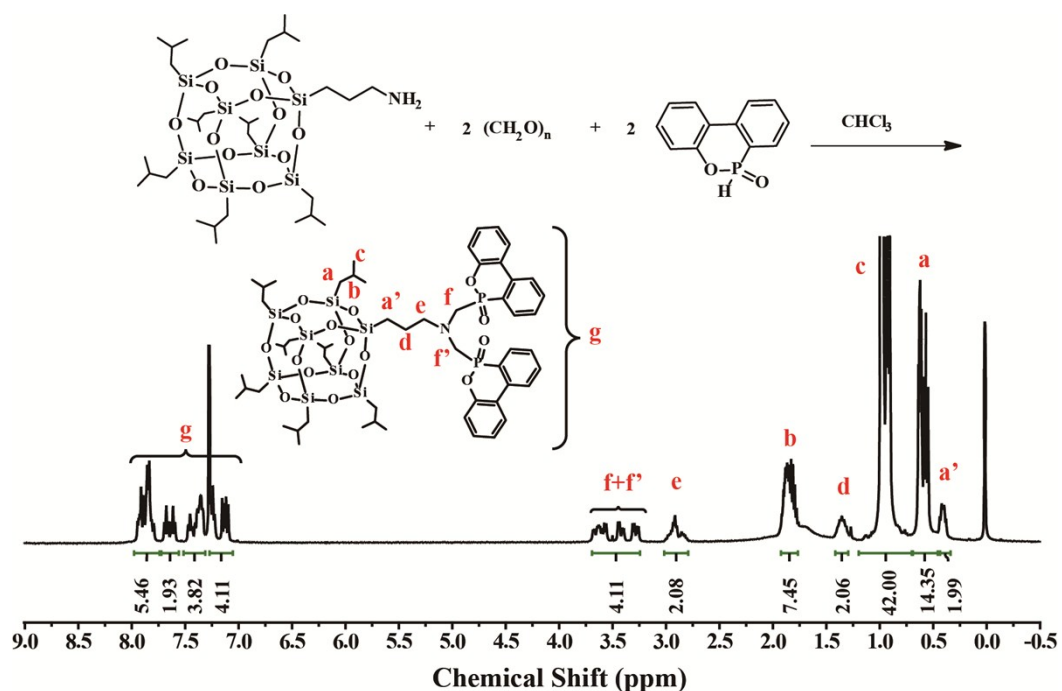

Figure S1. Synthetic route and  $^1\text{H}$  NMR spectrum of POSS-bisDOPO

The synthesis route and  $^1\text{H}$  NMR spectrum of POSS-bisDOPO was shown in Figure S1. The whole characterization data were listed as follows.  $^1\text{H}$  NMR (CDCl<sub>3</sub>,

400 MHz,  $\delta$ , ppm ): 7.95-7.10 (16H, Aromatic ring), 3.26-2.92 (4H, N-(CH<sub>2</sub>-P)<sub>2</sub>), 2.92-2.85(2H, N-CH<sub>2</sub>-CH<sub>2</sub>-CH<sub>2</sub>-Si), 1.92-1.76 (7H, Si-CH<sub>2</sub>-CH(-CH<sub>3</sub>)<sub>2</sub>), 1.41-1.24 (2H, Si-CH<sub>2</sub>-CH<sub>2</sub>-CH<sub>2</sub>-N), 1.12-0.76 (42H, Si-CH<sub>2</sub>-CH(-CH<sub>3</sub>)<sub>2</sub>), 0.66-0.52 (14H, Si-CH<sub>2</sub>-CH(-CH<sub>3</sub>)<sub>2</sub>), 0.45-0.36 (2H, Si-CH<sub>2</sub>-CH<sub>2</sub>-CH<sub>2</sub>-N). <sup>31</sup>P NMR (CDCl<sub>3</sub>, 400 MHz,  $\delta$ , ppm ): 14.7 (DOPO), 34.57 (POSS-bisDOPO). MS spectrum: 1353.2 [M + Na]<sup>+</sup>. FTIR (ATR, cm<sup>-1</sup>): 3063 and 1600 (phenyl in DOPO), 2410 (P-H in DOPO), 1085 (Si-O-Si, P-O-P), 908 (P-O-phenyl).

### Glass transition behavior

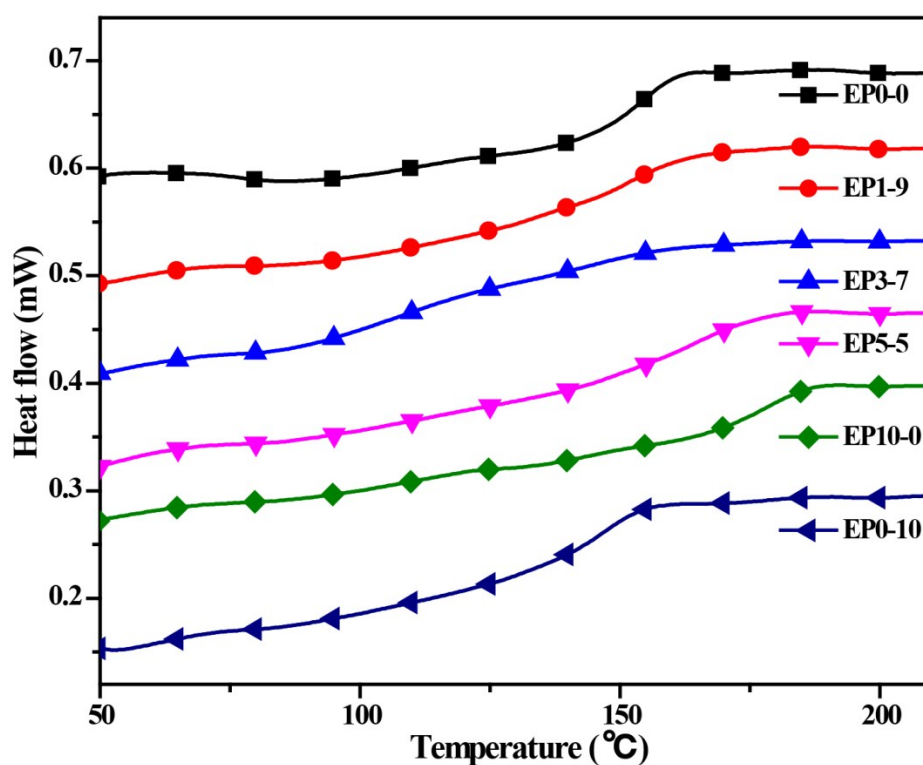

Figure S2. DSC curves of the cured EP composites

## Mechanical property

**Table S1** DMA data of the cured EP composites

| Sample  | E'-40°C/MPa | E'-190°C/MPa | tanδ  |
|---------|-------------|--------------|-------|
| EP 0-0  | 1245        | 10.1         | 0.729 |
| EP 1-9  | 1350        | 12.8         | 0.513 |
| EP 3-7  | 1235        | 14.2         | 0.467 |
| EP 5-5  | 1247        | 16.1         | 0.415 |
| EP 10-0 | 1244        | 19.6         | 0.453 |
| EP 0-10 | 1241        | 11.1         | 0.617 |

## Flame retardancy

**Table S2** Microscale combustion calorimeter data of the cured EP composites

| Sample            | EP0-0 | EP5-5 | EP10-0 | EP0-10 |
|-------------------|-------|-------|--------|--------|
| <b>PHRR (W/g)</b> | 430.2 | 28.4  | 255.6  | 369.2  |
| <b>THR (kJ/g)</b> | 22.7  | 1.7   | 17.9   | 20.1   |
